CORRECTION

# Correction: Mother's dietary quality during pregnancy and offspring's dietary quality in adolescence: Follow-up from a national birth cohort study of 19,582 mother-offspring pairs

Anne Ahrendt Bjerregaard, Thorhallur Ingi Halldorsson, Inge Tetens, Sjurdur Frodi Olsen

The first and fourth authors' names are published incorrectly in the article XML. The correct name for the first author is Anne Ahrendt Bjerregaard. The correct indexing in PubMed should read Bjerregaard AA. The correct name for the fourth author is Sjurdur Frodi Olsen. The correct indexing in PubMed should read Olsen SF.

The correct citation, therefore, should read: Bjerregaard AA, Halldorsson TI, Tetens I, Olsen SF (2019) Mother's dietary quality during pregnancy and offspring's dietary quality in adolescence: Follow-up from a national birth cohort study of 19,582 mother-offspring pairs. *PLoS Med* 16(9): e1002911. <https://doi.org/10.1371/journal.pmed.1002911>

## Reference

1. Ahrendt Bjerregaard A, Halldorsson TI, Tetens I, Frodi Olsen S (2019) Mother's dietary quality during pregnancy and offspring's dietary quality in adolescence: Follow-up from a national birth cohort study of 19,582 mother-offspring pairs. *PLoS Med* 16(9): e1002911. <https://doi.org/10.1371/journal.pmed.1002911> PMID: 31513597

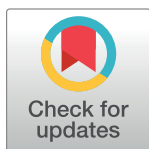

## OPEN ACCESS

**Citation:** Ahrendt Bjerregaard A, Halldorsson TI, Tetens I, Frodi Olsen S (2019) Correction: Mother's dietary quality during pregnancy and offspring's dietary quality in adolescence: Follow-up from a national birth cohort study of 19,582 mother-offspring pairs. *PLoS Med* 16(11): e1003004. <https://doi.org/10.1371/journal.pmed.1003004>

**Published:** November 26, 2019

**Copyright:** © 2019 Ahrendt Bjerregaard et al. This is an open access article distributed under the terms of the [Creative Commons Attribution License](https://creativecommons.org/licenses/by/4.0/), which permits unrestricted use, distribution, and reproduction in any medium, provided the original author and source are credited.
